# Supplementary material
Source: ML conference proceedings conference paper supplement (https://openreview.net/forum?id=WdvT2UgsTK)
Supplement: supplementary_material [file attachment]

## A FULL RESULTS ON TSP AND CVRP (SEEN SCALES)

In Table 1 regarding the learning-oriented methods, we mainly displayed their results yielded with the data augmentation strategy (A). Here we show the full results with (A) and without (N) the data augmentation in Table 5. As shown, the inference time without data augmentation is significantly shorter than that with data augmentation. On the other hand, it is clear that both Ours-inter and Ours-intra achieve the best average performance among all deep models, no matter the data augmentation strategy is used or not.

Table 5: Comparison results on TSP and CVRP (seen scales).

| Method                     | Test on N=60   |              |         | Test on N=100  |              |         | Test on N=150  |              |        | Average of Total costs |
|----------------------------|----------------|--------------|---------|----------------|--------------|---------|----------------|--------------|--------|------------------------|
|                            | Obj.           | Gap          | Time#   | Obj.           | Gap          | Time#   | Obj.           | Gap          | Time#  |                        |
| Concorde                   | 6.1729         | -            | (7m)    | 7.7646         | -            | (1.7h)  | 9.3462         | -            | (22m)  | 7.7612                 |
| LKH3                       | 6.1729         | 0.00%        | (14m)   | 7.7646         | 0.00%        | (9.8h)  | 9.3462         | 0.00%        | (2.1h) | 7.7612                 |
| (N) AMDKD-POMO*            | 6.2115         | 0.62%        | 6s      | 7.8312         | 0.86%        | 15s     | 9.5229         | 1.89%        | 4s     | 7.8552                 |
| (N) POMO-60                | 6.1811         | 0.13%        | ~       | 7.8514         | 1.12%        | ~       | 9.7019         | 3.81%        | ~      | 7.9115                 |
| (N) POMO-100               | 6.1972         | 0.39%        | ~       | 7.7908         | 0.34%        | ~       | 9.4500         | 1.11%        | ~      | 7.8160                 |
| (N) POMO-150               | 6.3031         | 2.11%        | ~       | 7.8702         | 1.36%        | ~       | 9.3806         | 0.39%        | ~      | 7.8513                 |
| (N) AMDKD-POMO             | 6.2076         | 0.56%        | ~       | 7.8292         | 0.83%        | ~       | 9.5035         | 1.68%        | ~      | 7.8468                 |
| (N) Omni-POMO <sup>‡</sup> | 6.3065         | 2.16%        | 5s      | 7.9425         | 2.29%        | 18s     | 9.5795         | 2.50%        | 5s     | 7.9428                 |
| (N) Ours-intra             | 6.1882         | 0.25%        | 6s      | 7.8007         | 0.47%        | 15s     | 9.4275         | 0.87%        | 4s     | 7.8055                 |
| (N) Ours-inter             | 6.1889         | 0.26%        | ~       | 7.7995         | 0.45%        | ~       | 9.4010         | 0.59%        | ~      | 7.7965                 |
| (A) AMDKD-POMO*            | 6.1828         | 0.16%        | 36s     | 7.7930         | 0.37%        | 2m      | 9.4539         | 1.15%        | 33s    | 7.8092                 |
| (A) POMO-60                | <b>6.1746</b>  | <b>0.03%</b> | ~       | 7.8050         | 0.52%        | ~       | 9.5909         | 2.62%        | ~      | 7.8568                 |
| (A) POMO-100               | 6.1768         | 0.06%        | ~       | <b>7.7753</b>  | <b>0.14%</b> | ~       | 9.3987         | 0.56%        | ~      | 7.7836                 |
| (A) POMO-150               | 6.1928         | 0.32%        | ~       | 7.7875         | 0.30%        | ~       | <b>9.3812</b>  | <b>0.36%</b> | ~      | 7.7868                 |
| (A) AMDKD-POMO             | 6.1820         | 0.15%        | ~       | 7.7916         | 0.35%        | ~       | 9.4473         | 1.08%        | ~      | 7.8070                 |
| (A) Omni-POMO <sup>‡</sup> | 6.2351         | 1.01%        | 34s     | 7.8650         | 1.29%        | 2.5m    | 9.4958         | 1.60%        | 37s    | 7.8653                 |
| (A) Ours-inter             | <b>6.1758</b>  | <b>0.05%</b> | 36s     | 7.7775         | 0.17%        | 2m      | 9.3883         | 0.45%        | 33s    | <b>7.7805</b>          |
| (A) Ours-intra             | 6.1758         | 0.05%        | ~       | <b>7.7764</b>  | <b>0.15%</b> | ~       | <b>9.3820</b>  | <b>0.38%</b> | ~      | <b>7.7781</b>          |
| HGS                        | 11.9471        | -            | (15.3h) | 15.5642        | -            | (25.6h) | 19.0554        | -            | (6.2h) | 15.5222                |
| LKH3                       | 11.9694        | 0.19%        | (3.5d)  | 15.6473        | 0.53%        | (6.5d)  | 19.2208        | 0.87%        | (13h)  | 15.6125                |
| (N) AMDKD-POMO*            | 12.5745        | 5.25%        | 7s      | 15.9485        | 2.47%        | 22s     | 20.0788        | 5.37%        | 6s     | 16.2006                |
| (N) POMO-60                | 12.1757        | 1.91%        | ~       | 16.3058        | 4.77%        | ~       | 20.5332        | 7.76%        | ~      | 16.3382                |
| (N) POMO-100               | 12.4140        | 3.91%        | ~       | 15.8369        | 1.75%        | ~       | 19.8641        | 4.24%        | ~      | 16.0383                |
| (N) POMO-150               | 12.7088        | 6.38%        | ~       | 16.0346        | 3.02%        | ~       | 19.4822        | 2.24%        | ~      | 16.0752                |
| (N) AMDKD-POMO             | 12.2731        | 2.73%        | ~       | 15.9498        | 2.48%        | ~       | 19.6619        | 3.18%        | ~      | 15.9616                |
| (N) Omni-POMO <sup>‡</sup> | 12.4879        | 4.53%        | 6s      | 16.1511        | 3.77%        | 20s     | 19.7527        | 3.66%        | 6s     | 16.1505                |
| (N) Ours-intra             | 12.1818        | 1.97%        | 7s      | 15.9166        | 2.26%        | 22s     | 19.5555        | 2.62%        | 6s     | 15.8846                |
| (N) Ours-inter             | 12.1838        | 1.98%        | ~       | 15.9093        | 2.22%        | ~       | 19.5342        | 2.51%        | ~      | 15.8758                |
| (A) AMDKD-POMO*            | 12.3561        | 3.42%        | 56s     | 15.8854        | 2.06%        | 3m      | 19.8395        | 4.12%        | 33s    | 16.0270                |
| (A) POMO-60                | <b>12.0656</b> | <b>0.99%</b> | ~       | 16.0914        | 3.39%        | ~       | 20.2573        | 6.31%        | ~      | 16.1381                |
| (A) POMO-100               | 12.2531        | 2.56%        | ~       | <b>15.7544</b> | <b>1.22%</b> | ~       | 19.6856        | 3.31%        | ~      | 15.8977                |
| (A) POMO-150               | 12.4322        | 4.06%        | ~       | 15.8924        | 2.11%        | ~       | <b>19.3683</b> | <b>1.64%</b> | ~      | 15.8976                |
| (A) AMDKD-POMO             | 12.1487        | 1.69%        | ~       | 15.8119        | 1.72%        | ~       | 19.5280        | 2.48%        | ~      | 15.8362                |
| (A) Omni-POMO <sup>‡</sup> | 12.2996        | 2.95%        | 45s     | 15.9878        | 2.72%        | 2.5m    | 19.5975        | 2.85%        | 45s    | 15.9616                |
| (A) Ours-inter             | <b>12.0660</b> | <b>1.00%</b> | 56s     | 15.7848        | 1.42%        | 3m      | 19.4109        | 1.87%        | 33s    | <b>15.7539</b>         |
| (A) Ours-intra             | 12.0663        | 1.00%        | ~       | <b>15.7781</b> | <b>1.37%</b> | ~       | <b>19.3938</b> | <b>1.78%</b> | ~      | <b>15.7461</b>         |

**Bold** and *italics* refer to the best and the second-best performance, respectively, among all deep models.

~ The inference time of a method equals to that of the preceding method in the above row.

<sup>‡</sup> The training size range of Omni-POMO is [50, 200], which is broader than that of ours, i.e., [60, 150].

## B DETAILED GENERALIZATION RESULTS ON BENCHMARK DATASETS.

We evaluate all methods on the classic benchmark datasets, including TSPLIB (Reinelt, 1991) and CVRPLIB (Uchoa et al., 2017), in which we choose representative instances with size  $N \in [50, 500]$ . Note that both benchmark datasets encompass a diverse range of sizes and distributions. The detailed results are shown in Table 6 and Table 7 where the gaps are calculated based on the optimal solution values for the instances. From two tables, we observe that our approach outperforms AMDKD-POMO and all POMO models trained on specific sizes on both benchmark datasets. Note that Omni-POMO is explicitly specialized for improving generalization across both size and distribution, which has the potential to achieve desirable performance on benchmark datasets whose

instances encompass a diverse range of sizes and distributions. More specific, the setting that explicitly training with more diverse sizes and distributions, will inherently favor Omni-POMO over our approach. Whereas, our approach still yields competitive performance in comparison against Omni-POMO, e.g., with the average gap of 5.45% (Ours) VS. 5.83% (Omni-POMO) on CVRPLIB, which further underscores the effectiveness of our approach.

Table 6: Detailed generalization results on instances from TSPLIB.

| Instance | Opt.   | POMO-60 |        | POMO-100 |        | POMO-150 |        | AMDKD-POMO |        | Omni-POMO <sup>‡</sup> |        | Ours   |        |
|----------|--------|---------|--------|----------|--------|----------|--------|------------|--------|------------------------|--------|--------|--------|
|          |        | Obj.    | Gap    | Obj.     | Gap    | Obj.     | Gap    | Obj.       | Gap    | Obj.                   | Gap    | Obj.   | Gap    |
| berlin52 | 7544   | 7544    | 0.00%  | 7545     | 0.01%  | 7613     | 0.92%  | 7545       | 0.01%  | 8003                   | 6.08%  | 7544   | 0.00%  |
| st70     | 675    | 677     | 0.30%  | 677      | 0.30%  | 678      | 0.44%  | 677        | 0.30%  | 680                    | 0.74%  | 677    | 0.30%  |
| eil76    | 538    | 547     | 1.67%  | 544      | 1.12%  | 549      | 2.05%  | 550        | 3.77%  | 557                    | 3.53%  | 544    | 1.12%  |
| rd100    | 7910   | 7920    | 0.13%  | 7910     | 0.00%  | 7952     | 0.53%  | 7934       | 0.30%  | 7958                   | 0.61%  | 7910   | 0.00%  |
| KroA100  | 21282  | 21786   | 2.34%  | 21667    | 1.81%  | 21596    | 1.48%  | 22077      | 3.74%  | 21305                  | 0.11%  | 21738  | 2.14%  |
| KroB100  | 22141  | 22941   | 3.61%  | 22370    | 1.03%  | 22575    | 1.96%  | 22745      | 2.73%  | 22650                  | 2.30%  | 22640  | 2.25%  |
| lin105   | 14379  | 14808   | 2.98%  | 14557    | 1.24%  | 14808    | 2.98%  | 14898      | 3.61%  | 14819                  | 3.06%  | 14753  | 2.60%  |
| pr124    | 59030  | 59031   | 0.00%  | 59388    | 0.61%  | 59595    | 0.96%  | 59521      | 0.83%  | 59238                  | 0.35%  | 59164  | 0.23%  |
| ch130    | 6110   | 6188    | 1.28%  | 6133     | 0.38%  | 6142     | 0.52%  | 6159       | 0.80%  | 6251                   | 2.31%  | 6119   | 0.15%  |
| pr136    | 96772  | 100459  | 38.12% | 97540    | 0.80%  | 97668    | 0.93%  | 97951      | 1.22%  | 97780                  | 1.04%  | 97258  | 0.50%  |
| gr137    | 699    | 746     | 6.72%  | 755      | 8.01%  | 759      | 8.58%  | 773        | 10.59% | 772                    | 10.44% | 747    | 6.87%  |
| ch150    | 6528   | 6679    | 2.31%  | 6559     | 0.48%  | 6579     | 0.78%  | 6583       | 0.82%  | 6586                   | 0.89%  | 6559   | 0.48%  |
| KroA200  | 29368  | 31819   | 8.35%  | 30415    | 3.57%  | 30015    | 2.20%  | 30672      | 4.44%  | 29823                  | 1.55%  | 29951  | 1.99%  |
| KroB200  | 29437  | 32020   | 8.78%  | 30880    | 4.90%  | 30172    | 2.50%  | 30990      | 5.28%  | 29814                  | 1.28%  | 30792  | 4.60%  |
| ts225    | 126643 | 135704  | 7.16%  | 130990   | 3.43%  | 128045   | 1.14%  | 128911     | 1.79%  | 128770                 | 1.68%  | 129297 | 2.10%  |
| a280     | 2579   | 3101    | 20.24% | 2951     | 0.45%  | 2788     | 8.10%  | 2809       | 8.92%  | 2695                   | 4.50%  | 2828   | 9.65%  |
| rd400    | 15281  | 18055   | 18.15% | 17342    | 13.49% | 16155    | 5.72%  | 16160      | 5.75%  | 15948                  | 4.37%  | 15968  | 4.50%  |
| fl417    | 11861  | 14319   | 20.72% | 14396    | 21.37% | 14225    | 19.93% | 14004      | 18.07% | 12683                  | 6.93%  | 13932  | 17.46% |
| pcb442   | 50778  | 71914   | 41.62% | 62145    | 22.39% | 54683    | 7.69%  | 63643      | 25.34% | 59761                  | 17.69% | 61152  | 20.43% |
| Avg. Gap | 0.00%  | -       | 9.71%  | -        | 4.49%  | -        | 4.18%  | -          | 5.17%  | -                      | 3.11%  | -      | 4.07%  |

Table 7: Detailed generalization results on instances from CVRPLIB.

| Instance   | Opt.  | POMO-60 |        | POMO-100 |        | POMO-150 |        | AMDKD-POMO |        | Omni-POMO <sup>‡</sup> |        | Ours  |        |
|------------|-------|---------|--------|----------|--------|----------|--------|------------|--------|------------------------|--------|-------|--------|
|            |       | Obj.    | Gap    | Obj.     | Gap    | Obj.     | Gap    | Obj.       | Gap    | Obj.                   | Gap    | Obj.  | Gap    |
| A-n53-k7   | 1010  | 1315    | 30.20% | 1318     | 30.50% | 1152     | 14.06% | 1111       | 10.00% | 1105                   | 9.41%  | 1136  | 12.48% |
| A-n60-k9   | 1354  | 1741    | 28.58% | 1739     | 28.43% | 1657     | 22.38% | 1574       | 16.25% | 1465                   | 8.20%  | 1453  | 7.31%  |
| A-n80-k10  | 1763  | 2692    | 52.69% | 2740     | 55.42% | 2816     | 59.73% | 2136       | 21.16% | 2127                   | 20.65% | 2100  | 19.12% |
| X-n101-k25 | 27591 | 29786   | 7.96%  | 29287    | 6.15%  | 29398    | 6.55%  | 29306      | 6.22%  | 29442                  | 6.71%  | 28533 | 3.41%  |
| X-n110-k13 | 14971 | 15530   | 3.73%  | 15161    | 1.27%  | 15130    | 1.06%  | 15202      | 1.54%  | 15285                  | 2.10%  | 15102 | 0.88%  |
| X-n120-k6  | 13332 | 14239   | 6.80%  | 14570    | 9.29%  | 14060    | 5.46%  | 14010      | 5.09%  | 13944                  | 4.59%  | 13882 | 4.13%  |
| X-n129-k18 | 28940 | 30154   | 4.20%  | 29569    | 2.17%  | 29343    | 1.39%  | 29702      | 2.63%  | 29975                  | 3.58%  | 29306 | 1.27%  |
| X-n139-k10 | 13590 | 14269   | 5.00%  | 14080    | 3.61%  | 13855    | 1.95%  | 13890      | 2.21%  | 14019                  | 3.16%  | 13812 | 1.63%  |
| X-n148-k46 | 43448 | 46146   | 6.21%  | 47621    | 9.61%  | 45850    | 5.53%  | 46451      | 6.91%  | 46438                  | 6.88%  | 45600 | 4.95%  |
| X-n157-k13 | 16876 | 17663   | 4.66%  | 18302    | 8.45%  | 18340    | 8.68%  | 17523      | 3.83%  | 17107                  | 1.37%  | 17414 | 3.19%  |
| X-n167-k10 | 20557 | 22306   | 8.51%  | 21297    | 3.60%  | 20995    | 2.13%  | 21068      | 2.49%  | 21436                  | 4.28%  | 20960 | 1.96%  |
| X-n190-k8  | 16980 | 18757   | 10.47% | 18164    | 6.97%  | 18140    | 6.83%  | 18169      | 7.00%  | 17645                  | 3.92%  | 17770 | 4.65%  |
| X-n200-k36 | 58578 | 62737   | 7.10%  | 61933    | 5.73%  | 61397    | 4.81%  | 61384      | 4.79%  | 61496                  | 4.98%  | 61514 | 5.01%  |
| X-n251-k28 | 38684 | 42430   | 9.69%  | 41360    | 6.92%  | 40024    | 3.47%  | 40595      | 4.94%  | 40059                  | 3.55%  | 40046 | 3.52%  |
| X-n298-k31 | 34231 | 38749   | 13.20% | 38611    | 12.80% | 35663    | 4.18%  | 37221      | 8.74%  | 36384                  | 6.29%  | 35779 | 4.52%  |
| X-n351-k40 | 25896 | 30289   | 16.96% | 28343    | 9.45%  | 27952    | 7.94%  | 28315      | 9.34%  | 27515                  | 6.25%  | 27487 | 6.14%  |
| X-n401-k29 | 66154 | 72209   | 9.15%  | 71173    | 7.59%  | 69641    | 5.27%  | 69227      | 4.65%  | 68234                  | 3.14%  | 69682 | 5.33%  |
| X-n449-k29 | 55233 | 63569   | 15.09% | 61915    | 12.08% | 58418    | 5.77%  | 59929      | 8.50%  | 58037                  | 5.08%  | 58563 | 6.03%  |
| X-n491-k59 | 66483 | 78463   | 18.02% | 75620    | 13.74% | 71668    | 7.80%  | 72087      | 8.43%  | 70923                  | 6.68%  | 71787 | 7.98%  |
| Avg. Gap   | 0.00% | -       | 13.59% | -        | 12.30% | -        | 9.21%  | -          | 7.09%  | -                      | 5.83%  | -     | 5.45%  |

## C ABLATION STUDY ON REGULARIZATION SCHEMES

To verify the effectiveness of the regularization schemes designed in our approach, we further analyze the evaluation results of our accomplished models after training on each size with inter-task regularization scheme, intra-task regularization scheme, and without regularization scheme, across three sizes (i.e., 60, 100 and 150) for TSP. The corresponding curves are depicted in Figure 3, where we also present the average objective values across those sizes, in order to show the overall improved cross-size generalization performance. As revealed, both inter-task and intra-task regularization schemes accelerate the learning efficiency and boost the overall results in comparison with the one without regularization scheme, which showcases the effectiveness of the proposed regularization schemes. Moreover, inter-task regularization scheme is superior to the intra-task one in terms of the learning efficiency on smaller sizes (i.e., 60), while the other way round on larger sizes (i.e., 100 and 150). This is reasonable since the intra-task regularization scheme concentrate more

on efficiently learning the latest lager sizes. Furthermore, the intra-task achieves the fastest learning efficiency and the lowest objective value when averaging the objective values across all three sizes.

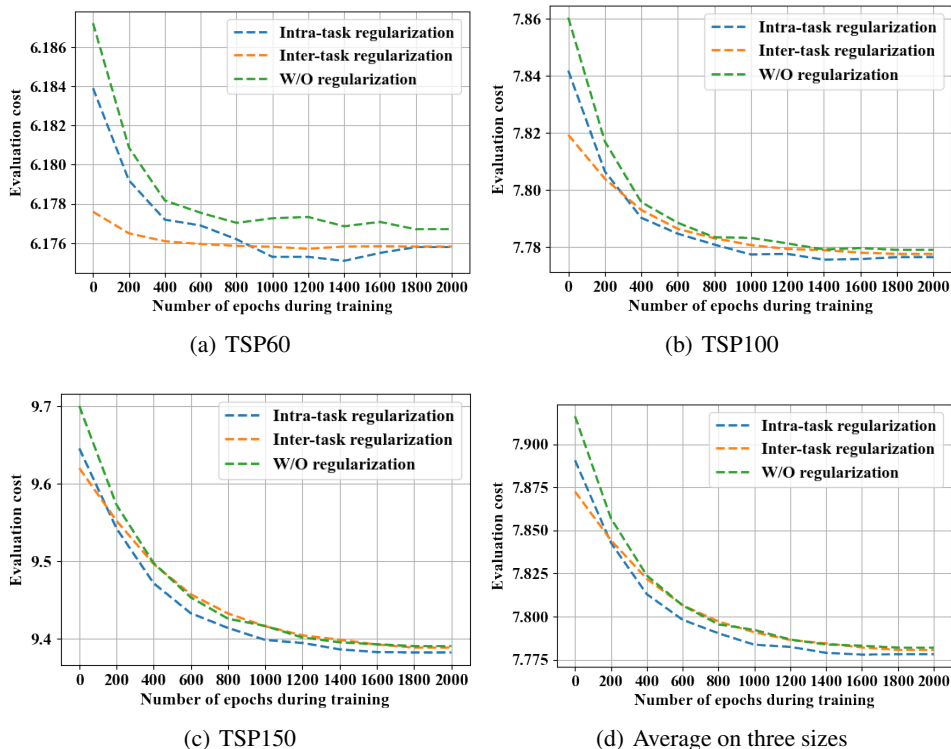

Figure 3: Curves of learning progress for our approach on TSP.

Table 8: Validation results on seen and unseen sizes.

|                              | Method                       | Test on N=100 |         | Test on N=150 |         | Test on N=200 |       |
|------------------------------|------------------------------|---------------|---------|---------------|---------|---------------|-------|
|                              |                              | Obj.          | Gap     | Obj.          | Gap     | Obj.          | Gap   |
| TSP                          | Ours (after training on 60)  | 7.8419        | 1.00%   | 9.6460        | 3.21%   | 11.2975       | 5.90% |
|                              | Ours (after training on 70)  | 7.8065        | 0.54%   | 9.5426        | 2.10%   | 11.1413       | 4.43% |
|                              | Ours (after training on 80)  | 7.7902        | 0.33%   | 9.4715        | 1.34%   | 11.0082       | 3.19% |
|                              | Ours (after training on 90)  | 7.7846        | 0.26%   | 9.4327        | 0.93%   | 10.9116       | 2.28% |
|                              | Ours (after training on 100) | 7.7808        | 0.21%   | 9.4137        | 0.72%   | 10.8585       | 1.78% |
|                              | Ours (after training on 110) | 7.7773        | 0.16%   | 9.3982        | 0.56%   | 10.8029       | 1.26% |
|                              | Ours (after training on 120) | 7.7775        | 0.17%   | 9.3943        | 0.52%   | 10.7880       | 1.12% |
|                              | Ours (after training on 130) | 7.7755        | 0.14%   | 9.3861        | 0.43%   | 10.7629       | 0.89% |
|                              | Ours (after training on 140) | 7.7757        | 0.14%   | 9.3824        | 0.39%   | 10.7526       | 0.79% |
| Ours (after training on 150) | 7.7764                       | 0.15%         | 9.3820  | 0.38%         | 10.7445 | 0.71%         |       |
| CVRP                         | Ours (after training on 60)  | 15.9992       | 2.23%   | 20.0320       | 4.22%   | 23.5642       | 6.08% |
|                              | Ours (after training on 70)  | 15.8721       | 1.42%   | 19.6862       | 2.42%   | 23.0514       | 3.77% |
|                              | Ours (after training on 80)  | 15.8275       | 1.13%   | 19.5619       | 1.78%   | 22.8025       | 2.65% |
|                              | Ours (after training on 90)  | 15.8092       | 1.02%   | 19.5051       | 1.48%   | 22.7007       | 2.19% |
|                              | Ours (after training on 100) | 15.7987       | 0.95%   | 19.4732       | 1.31%   | 22.6235       | 1.84% |
|                              | Ours (after training on 110) | 15.7924       | 0.91%   | 19.4466       | 1.18%   | 22.5745       | 1.62% |
|                              | Ours (after training on 120) | 15.7870       | 0.88%   | 19.4282       | 1.08%   | 22.5361       | 1.45% |
|                              | Ours (after training on 130) | 15.7849       | 0.86%   | 19.4148       | 1.01%   | 22.4948       | 1.26% |
|                              | Ours (after training on 140) | 15.7835       | 0.85%   | 19.4075       | 0.97%   | 22.4695       | 1.15% |
| Ours (after training on 150) | 15.7781                      | 0.82%         | 19.3938 | 0.90%         | 22.4436 | 1.03%         |       |

## D VALIDATION ON BOTH SEEN AND UNSEEN SIZES

We evaluate the obtained models after training on each size with intra-task regularization scheme. On both seen and unseen sizes, i.e., 100, 150 and 200, these models are evaluated to showcase that our approach can consistently improve the performance of the deep model, as the training progresses. The results are summarized in Table 8, where the gaps are calculated based on the solutions acquired by Concorde for TSP and HGS for CVRP in Table 1. We observe that when we evaluate the models on size 100, it progressively reduces the gaps before the training process reaching size 100. Furthermore, it effectively retains the acquired knowledge and superiority on size 100, after further trained on instances with larger sizes. The models trained after size 100 still show decreasing gaps on size 100. Similarly, in the case of testing on the larger sizes, i.e., 150 and 200, our approach consistently enhances the performance during the whole training phase. These findings highlight that our approach excels not only in preserving superior performance on small sizes but also in consistently enhancing performance on larger sizes.
